# Supplementary material for: A New Family of Predicted Krüppel-Like Factor Genes and Pseudogenes in Placental Mammals
Source: PubMed Central journal article supplement (PMC3820594; doi:10.1371/journal.pone.0081109), 2013-11-07
Supplement: pone.0081109.s002.pdf [file pone.0081109.s002.pdf]

**Figure S1. Alignment of zinc fingers of 36 predicted KLF18 proteins.** Conserved cysteines and histidines involved in metal binding of zinc fingers are on black background. Three conserved DNA base-interacting arginines are shaded in magenta. Three negatively-charged residues interacting with the three arginines are shaded in dark grey. Substitutions in these conserved residues are colored red. Insertions and deletions are highlighted in cyan. Color coding of species names is as follows: black: Euarchontoglires; red: Laurasiatheria; green: Afrotheria; and magenta: Xenarthra.

|                  |                                                                                                                                                                                                                                                   |
|------------------|---------------------------------------------------------------------------------------------------------------------------------------------------------------------------------------------------------------------------------------------------|
| human            | CTYEDCKMSYSKACHLRT <sup>EMRKH</sup> HTGK <sup>EPYV</sup> CDVEGCTWKFARS <sup>DELNR</sup> HK <sup>KRHT</sup> GERPYLCS <sup>IC</sup> SKNFARS <sup>SDHLKQ</sup> HA-KVH                                                                                |
| chimp            | CAYQDCGKSYTKSHHLKDEMRKHHTGK <sup>EPV</sup> CNAPECEWKFTRL <sup>LLR</sup> REK <sup>NK</sup> ENR <sup>KRSY</sup> FC <sup>SM</sup> CN <sup>KSF</sup> SRLCYLRQHE <sup>KKH</sup>                                                                        |
| gorilla          | CTYEDCKMSY <sup>GK</sup> ACHLRT <sup>EMRKH</sup> HTGK <sup>EPYV</sup> CDVEGCTWKFARS <sup>DELNR</sup> HK <sup>KRHT</sup> GERPYLCS <sup>IC</sup> SKNFARS <sup>SDHLKQ</sup> HA-KVH                                                                   |
| orangutan        | CTYEDCKMSYSKACHLRT <sup>EMRKH</sup> HTGK <sup>EPYV</sup> CDVEGCTWKFARS <sup>DELNR</sup> HK <sup>KRHT</sup> GERPYLCS <sup>IC</sup> SKNFARS <sup>SDHLKQ</sup> HA-KVH                                                                                |
| gibbon           | CTYEDCKMSYSKACHLRT <sup>EMRKH</sup> HTGK <sup>EPYV</sup> CDVEGCTWKFARS <sup>DELNR</sup> HK <sup>KRHT</sup> GERPYLCS <sup>IC</sup> SKNFARS <sup>SDHLKQ</sup> HA-KIH                                                                                |
| rhesus           | CTYENC <sup>KKS</sup> YK <sup>KACH</sup> LRT <sup>EMRKH</sup> HTGK <sup>EPY</sup> ICDVEGCMWKFTRS <sup>DELNR</sup> HK <sup>KRHT</sup> GERPYLCS <sup>IC</sup> NKNFARS <sup>SDHLKQ</sup> HA-KVH                                                      |
| baboon           | CTYENC <sup>KKS</sup> YK <sup>KACH</sup> LRT <sup>EMRKH</sup> HTGK <sup>EPY</sup> ICDVEGCTWKFTRS <sup>DELNR</sup> HK <sup>KRHT</sup> GERPYLCS <sup>IC</sup> NKNFARS <sup>SDHLKQ</sup> HA-KVH                                                      |
| squirrel_monkey  | CPHEDCKMSYSKACHLRT <sup>EMRKH</sup> HTGK <sup>EPV</sup> CDVEGCTWKFIRS <sup>DELNR</sup> HK <sup>KRHT</sup> GERPYLCPV <sup>C</sup> SKNFARS <sup>SDHLKQ</sup> HA-KVH                                                                                 |
| marmoset         | CPHKDC <sup>KNS</sup> YSKACHLRT <sup>EMRKH</sup> HTGK <sup>EPV</sup> CDVEGCTWKFGRS <sup>DELNR</sup> HK <sup>KRHT</sup> GERPYLCPV <sup>C</sup> SKNFARS <sup>SDHLKQ</sup> HG-KVH                                                                    |
| bushbaby         | CAYEDCGKSYAKSYHLR <sup>IEQRKH</sup> HTGK <sup>EPYA</sup> CDVTGCTWRFPRS <sup>DELKR</sup> HK <sup>KRHS</sup> GERPYRCMK <sup>CR</sup> KNFARS <sup>SDHLRQ</sup> HE-KMH                                                                                |
| tree shrew       | CTYQDCGKSYAKSSHLR <sup>IEERKH</sup> HTGK <sup>EPYV</sup> CNVMGCTWKFPRS <sup>DELSR</sup> HK <sup>KRHS</sup> GERPYLCTD <sup>C</sup> NRNFARS <sup>SDHLKQ</sup> HQ-RVH                                                                                |
| mouse            | CSKENCGKAFVKSSQLRE <sup>IERI</sup> HTGK <sup>EPYI</sup> CTYYPCTWKFARQ <sup>YLA</sup> RHK <sup>KRHT</sup> GYP <sup>PFK</sup> CENC <sup>DM</sup> TYSRSD <sup>HLKA</sup> HI-KR                                                                       |
| rat              | CHY <sup>---</sup> CGHSF <sup>SKS</sup> SHLTG <sup>HIRKH</sup> HTGK <sup>EPYK</sup> CSR <sup>---</sup> CTWTF <sup>SRS</sup> DEL <sup>TR</sup> EMR <sup>KHT</sup> GDR <sup>PHQ</sup> CQ <sup>IC</sup> Y <sup>TTY</sup> PRSD <sup>NLNE</sup> HV-KKH |
| kangaroo_rat     | CTYPGCGKSYLKP <sup>SHLQ</sup> IE <sup>NRKH</sup> HTGK <sup>EPYV</sup> CDVTGCTWKF <sup>SRS</sup> DEL <sup>KR</sup> HK <sup>RTH</sup> SQ <sup>DRPY</sup> LCT <sup>CK</sup> NKNFARS <sup>DHLVQ</sup> HE-RVH                                          |
| naked_mole-rat   | CPHQDCGKSYARSSCLRV <sup>IEQRTH</sup> S <sup>GKPYA</sup> CNVQCGEWF <sup>SRS</sup> DEL <sup>KR</sup> EM <sup>RRHT</sup> GERPYKCEA <sup>CS</sup> KS <sup>FARS</sup> DHL <sup>TQ</sup> HQ-RVH                                                         |
| guinea_pig       | CPHQCGKSYMRP <sup>SHLRV</sup> IEQR <sup>TH</sup> S <sup>GQKYA</sup> CNVQCGEWF <sup>FNR</sup> DEL <sup>KR</sup> EM <sup>RRHS</sup> GERPYTCPI <sup>C</sup> Q <sup>KKF</sup> PRSD <sup>HVIQ</sup> HQ-RVH                                             |
| squirrel         | CTYQDCGKCYTKY <sup>SHLQ</sup> IE <sup>ERKH</sup> HTG <sup>DKPYV</sup> CNEIGCTWKFTRS <sup>DELRR</sup> HK <sup>KRHS</sup> GERPYLCTR <sup>CK</sup> TFARS <sup>DHLKQ</sup> HE-RVH                                                                     |
| rabbit           | CTYPD <sup>CGK</sup> SYK <sup>SSYLQ</sup> IE <sup>ERKH</sup> HTGK <sup>EPY</sup> ECSEEGCPWF <sup>SRS</sup> DEL <sup>S</sup> RHK <sup>KRHS</sup> GERPYTCT <sup>CK</sup> DK <sup>SFARS</sup> DHL <sup>RQ</sup> HQ-KVH                               |
| pika             | CTYPD <sup>CGK</sup> SYK <sup>SPSHL</sup> IE <sup>ERRH</sup> GERPYACDITGCTWTF <sup>SRK</sup> DEL <sup>TR</sup> HK <sup>KRHS</sup> GERPYMCPK <sup>C</sup> NK <sup>TFARS</sup> DHL <sup>VQ</sup> HQ-KVH                                             |
| alpaca           | CTYQDCGKSYKSSHLR <sup>IEERL</sup> HT-----                                                                                                                                                                                                         |
| sheep            | CTY <sup>---</sup> NCGKAYAKSSHLR <sup>IEERV</sup> HTGK <sup>EPYK</sup> CNANGCTWAF <sup>SRS</sup> DEL <sup>LR</sup> HK <sup>KRHT</sup> TRERPYLCTI <sup>C</sup> NK <sup>DFARS</sup> DHL <sup>KQ</sup> HQ-RVH                                        |
| cow              | CTYKNC <sup>GK</sup> AYAKSSHLR <sup>IEERV</sup> HTGK <sup>EPYK</sup> CNVNGCTWAF <sup>SRS</sup> DEL <sup>NR</sup> EN <sup>KRHT</sup> TRERPYLCAI <sup>C</sup> DK <sup>DFAR</sup> PDHL <sup>TQ</sup> HQ-RVH                                          |
| dolphin          | CTYQCGKSYKSSHLR <sup>IEERL</sup> HTGK <sup>EPYK</sup> CNAK <sup>G</sup> CTWAF <sup>SRS</sup> DEL <sup>NR</sup> EM <sup>RKHT</sup> TRERPYQCT <sup>CK</sup> DR <sup>NFARS</sup> DHL <sup>KQ</sup> HQ-RVH                                            |
| horse            | CTYQDCGKSYTKP <sup>SHLRI</sup> IE <sup>ERTH</sup> HTGK <sup>EPY</sup> CNVK <sup>G</sup> CTWKF <sup>SRS</sup> DEL <sup>NR</sup> HK <sup>KRHS</sup> GERPYWCT <sup>CK</sup> CH <sup>RTFARS</sup> DHL <sup>KQ</sup> HE-RVH                            |
| cat              | CTYQDCGKSYTKP <sup>SHLRI</sup> IE <sup>ERKH</sup> HTGK <sup>EPY</sup> CNVK <sup>G</sup> CTWKF <sup>PRS</sup> DEL <sup>S</sup> RHK <sup>KRHS</sup> GERPYLCT <sup>CK</sup> NRNFARS <sup>DHLKQ</sup> HQ-RIH                                          |
| dog              | CTYQDCGKSYTKP <sup>SHLRI</sup> IE <sup>ERKH</sup> HTGK <sup>EPYK</sup> CNVK <sup>G</sup> CTWRF <sup>PRS</sup> DEL <sup>NR</sup> HK <sup>KRHS</sup> GERPYLCT <sup>CK</sup> NRNFARS <sup>DHLKQ</sup> HQ-RIH                                         |
| panda            | CTYQDCGKSYTKP <sup>SHLRI</sup> IE <sup>ERKH</sup> HTGK <sup>EPYK</sup> CNVK <sup>G</sup> CPWF <sup>PRS</sup> DEL <sup>NR</sup> HK <sup>KRHS</sup> GERPYLCT <sup>CK</sup> NRNFARS <sup>DHLKQ</sup> HQ-RIH                                          |
| microbat         | CTYQDCQKSYKSSCLQ <sup>IEDRKH</sup> HTGERPYKCNVKGCTWEFARS <sup>DELKR</sup> EN <sup>KKHS</sup> GERPYLCT <sup>IL</sup> CD <sup>RRFARS</sup> DHL <sup>KQ</sup> HQ-KVH                                                                                 |
| megabat          | CTYQDCGKSYKSR <sup>SHLQ</sup> IE <sup>ERKH</sup> HTGK <sup>EPYK</sup> CNVK <sup>G</sup> CTWEFARS <sup>DELNR</sup> HK <sup>KRHS</sup> GERPYLCT <sup>IL</sup> CNKNFARS <sup>DHLKQ</sup> HQ-RVH                                                      |
| shrew            | CTFQCGGKQYAKPYQLR <sup>IEERV</sup> HTG <sup>DKPYI</sup> CDVKGCPWKFARS <sup>DELSR</sup> HK <sup>KKHT</sup> GERPYRCPO <sup>C</sup> PM <sup>DFAR</sup> DHL <sup>KQ</sup> HA-RVH                                                                      |
| elephant         | CTYQDCGKSYLRRARL <sup>IEECI</sup> HTGK <sup>EPYI</sup> CNVK <sup>G</sup> CAR <sup>F</sup> SRS <sup>DL</sup> YRHK <sup>KKH</sup> NGERPYVCTR <sup>C</sup> NKNFARS <sup>DHLKL</sup> HQ-KSH                                                           |
| manatee          | CTYQCGKSYSRHSRLR <sup>IEECI</sup> HTGK <sup>EPYI</sup> CNVK <sup>G</sup> CTWKF <sup>SRLD</sup> LN <sup>RHK</sup> KR <sup>HS</sup> GERPYLCT <sup>TC</sup> NRNFARS <sup>DHLKL</sup> HQ-KSH                                                          |
| elephant_shrew   | CPYQCGGKFFSKLSYFQ <sup>KIQR</sup> IEHTG <sup>MKV</sup> FV <sup>CNVK</sup> GCMQ <sup>KFC</sup> SD <sup>GLGR</sup> KK <sup>IHS</sup> NERPYLCT <sup>VC</sup> CN <sup>KGF</sup> SRS <sup>HLKQ</sup> HQ-KTH                                            |
| cape_golden_mole | CTYQDC <sup>EKS</sup> YSTHANLR <sup>KEFI</sup> HTG <sup>KKPYI</sup> CNVK <sup>G</sup> CTWKF <sup>SRS</sup> DL <sup>KRHT</sup> KK <sup>HS</sup> GERPYLCT <sup>TC</sup> NRNFARS <sup>DHLKQ</sup> HQ-KQH                                             |
| armadillo        | CKHQDCGKSF <sup>SKASYI</sup> Q <sup>IEERV</sup> HS <sup>GKPY</sup> SCDVEGCTWKFTRS <sup>DELSR</sup> HK <sup>KRHS</sup> GERPYPCT <sup>CK</sup> NR <sup>SFARS</sup> DHL <sup>KQ</sup> HQ-KIH                                                         |
| sloth            | CTFQCGGKSF <sup>SKSYLQ</sup> IE <sup>ERKH</sup> HTGK <sup>EPY</sup> CNVK <sup>G</sup> CTWKF <sup>SRT</sup> DEL <sup>S</sup> RHK <sup>KRHS</sup> GERPYPCT <sup>CK</sup> NR <sup>SFARS</sup> DHL <sup>KQ</sup> HE-RVH                               |
