# Supplementary material for: A New Family of Predicted Krüppel-Like Factor Genes and Pseudogenes in Placental Mammals
Source: PubMed Central journal article supplement (PMC3820594; doi:10.1371/journal.pone.0081109), 2013-11-07

Figure S4. A phylogenetic tree of SP/KLF proteins generated by MOLPHY. Each protein is denoted by its species name abbreviation followed by the protein name. Species name abbreviations are: bt, *Bos taurus* (cow); cf, *Canis familiaris* (domestic dog); ch, *Choloepus hoffmanni* (two-toed sloth); cj, *Callithrix jacchus* (common marmoset); cp, *Cavia porcellus* (guinea pig); dn, *Dasypus novemcinctus* (nine-banded armadillo); do, *Dipodomys ordii* (kangaroo rat); dr, *Danio rerio* (zebrafish); ec, *Equus caballus* (horse); hs, *Homo sapiens* (human); la, *Loxodonta Africana* (African Savannah elephant); mm, *Mus musculus* (mouse); oc, *Oryctolagus cuniculus* (rabbit); rn, *Rattus norvegicus* (rat); sa, *Sorex araneus* (common shrew); tb, *Tupaia belangeri* (tree shrew); xt, *Xenopus tropicalis* (Western clawed frog).

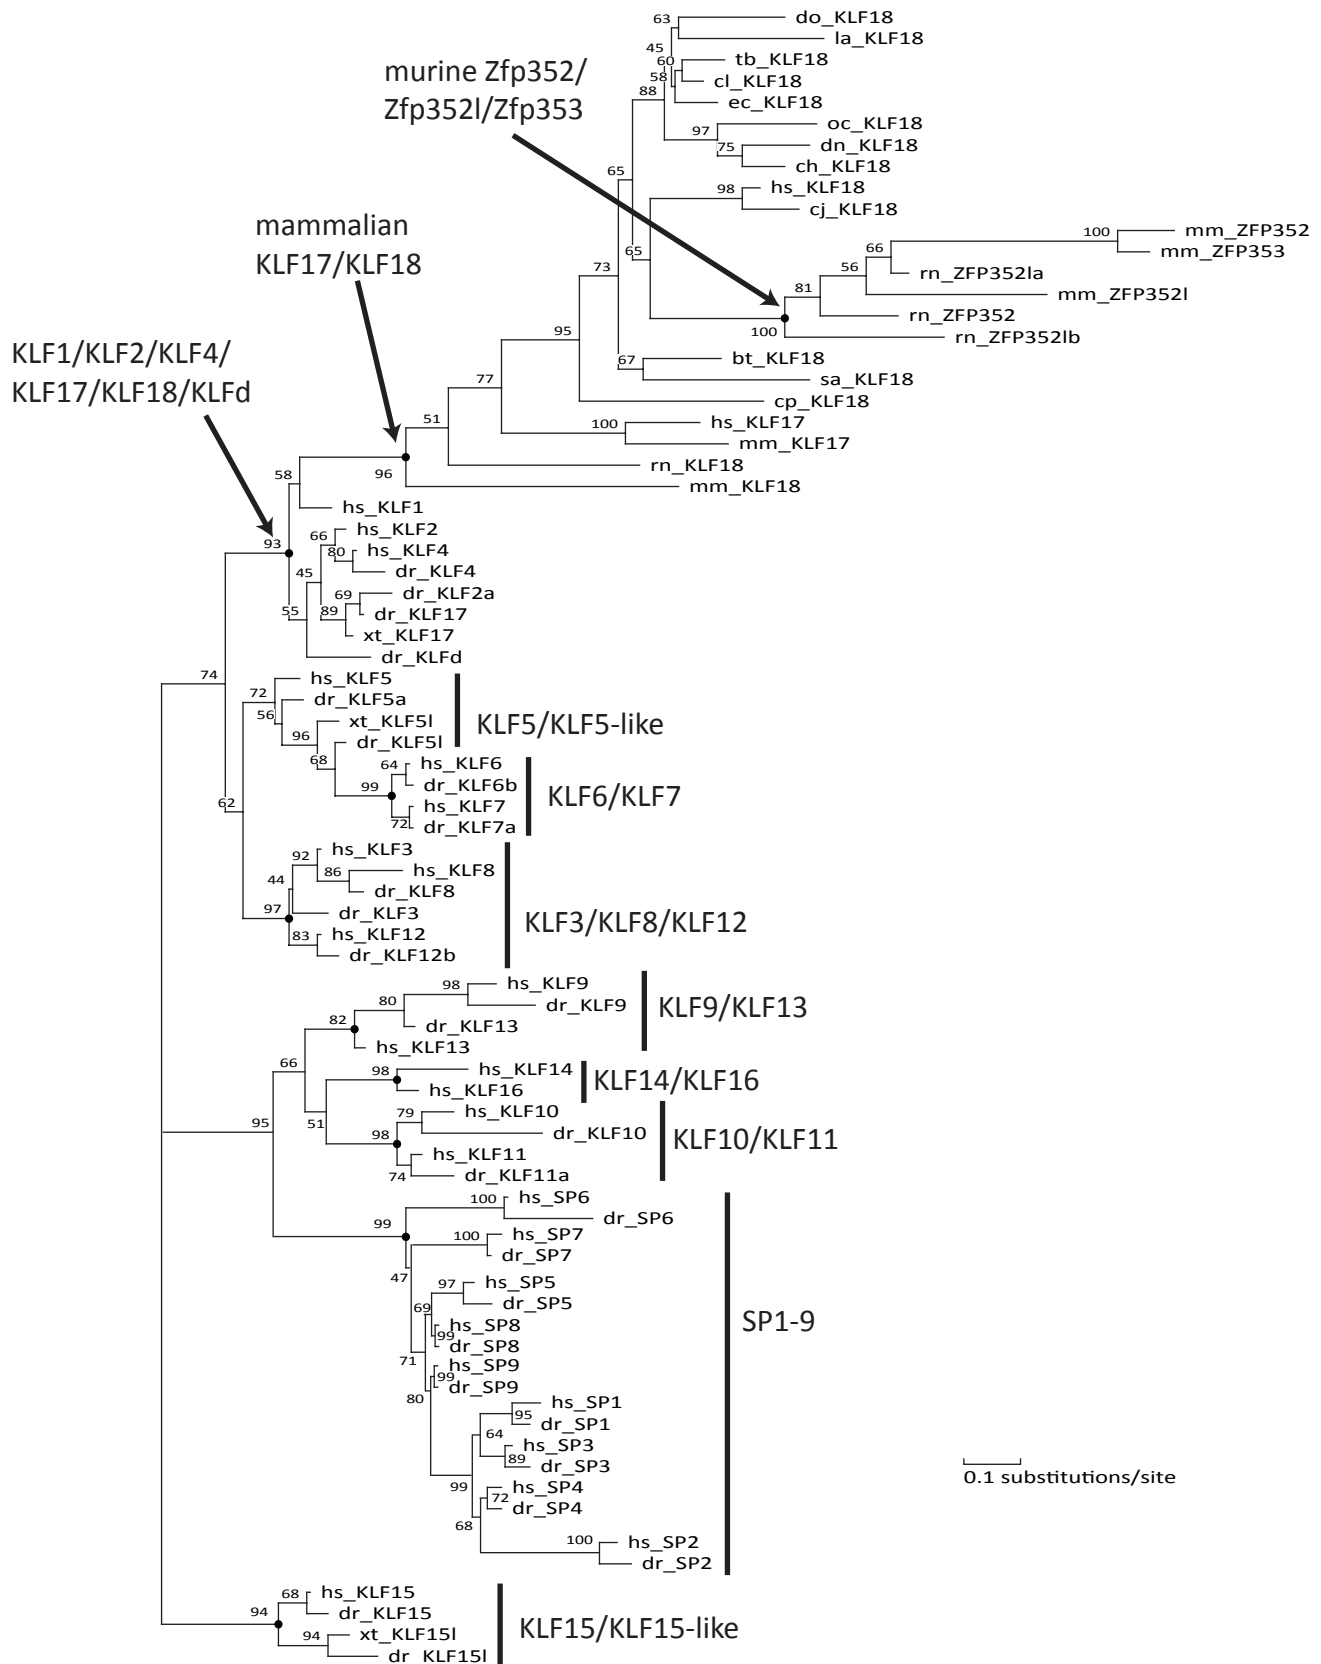

Supplement: pone.0081109.s005.pdf [file pone.0081109.s005.pdf]
